# Supplementary material for: One-step synthesis of Cu-doped Pb10(PO4)6Cl2 apatite: a wide-gap semiconductor
Source: Royal Society of Chemistry journal article supplement (doi:10.1039/d4qi01140f), 2024-01-01
Supplement: d4qi01140f1.pdf [file d4qi01140f1.pdf]

**Electronic Supplementary Information for**  
**“One-step synthesis of Cu-doped  $\text{Pb}_{10}(\text{PO}_4)_6\text{Cl}_2$  apatite: A**  
**wide-gap semiconductor”**

Wuzhang Yang<sup>1,2,3\*</sup>, Zhihong Pang<sup>1\*</sup>, and Zhi Ren<sup>1,2†‡</sup>

*<sup>1</sup>Department of Physics, School of Science,  
Westlake University, 18 Shilongshan Road,*

*Hangzhou, 310024, Zhejiang Province, PR China*

*<sup>2</sup>Institute of Natural Sciences, Westlake Institute for Advanced Study,  
18 Shilongshan Road, Hangzhou, 310024, Zhejiang Province, PR China and*

*<sup>3</sup>Department of Physics, Fudan University, Shanghai 200433, PR China*

(Dated: May 30, 2024)

---

\* These authors contributed equally to this work.

† Electronic Supplementary Information (ESI) available.

‡ Electronic address: [renzhi@westlake.edu.cn](mailto:renzhi@westlake.edu.cn)

# 1. EDX elemental mappings for the $\text{Pb}_{10}(\text{PO}_4)_6\text{Cu}_x\text{Cl}_2$ samples with $0 \leq x \leq 1.0$

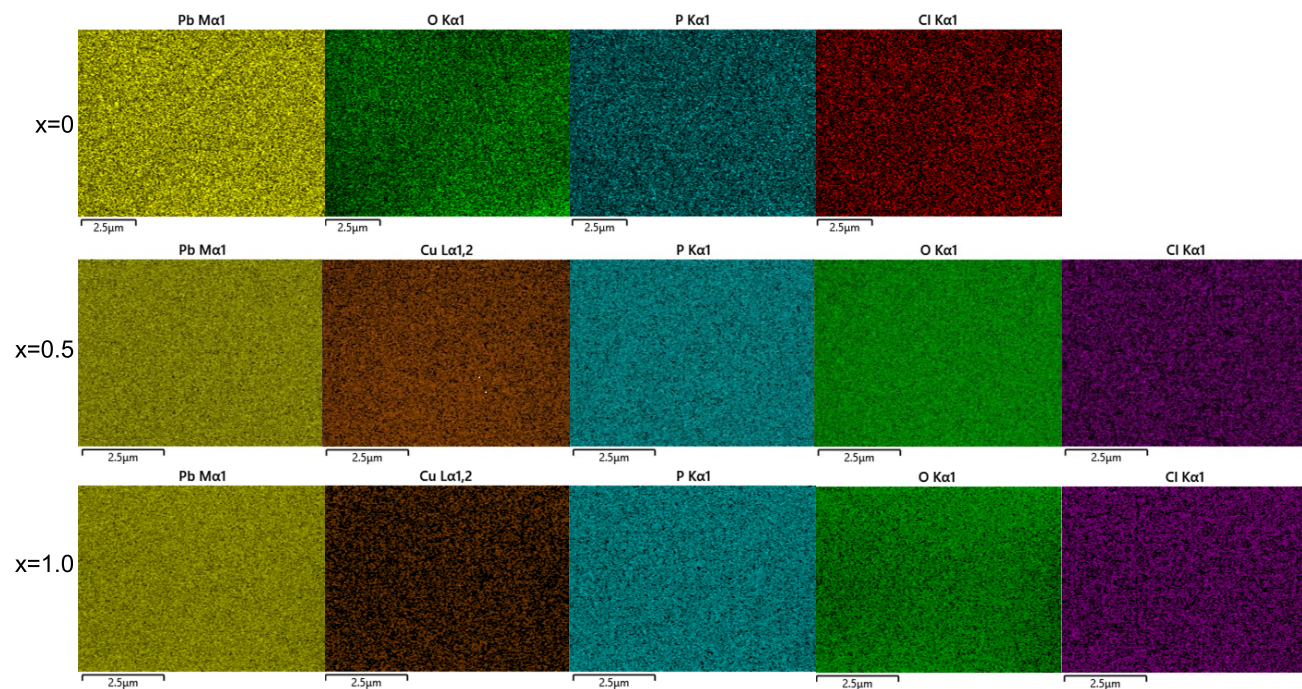

FIG. 1: EDX elemental maps of Pb, Cu, P, O, and Cl for the  $\text{Pb}_{10}(\text{PO}_4)_6\text{Cu}_x\text{Cl}_2$  samples.
